# 1 **Non-Medical Management of Hypertension and Its associated Factors among** 2 **Hypertensive Patients Attending Public Hospitals in Hawassa City, Ethiopia.**

3 Meheret Mekonnen<sup>1</sup>, Merihun Eshetu<sup>2</sup>, Feleke Tefesse<sup>3</sup>, Dereje Geleta<sup>3</sup>

4 1. Shebadino District Health Departement, sidama regional Health bureau

5 2. Hawassa College of Health Sciences, Hawassa Ethiopia

6 3. College of Medicine, and Health Sciences, Hawassa University, Ethiopia

7

8 **Corresponding author:** Dereje Geleta

9 **Email address:** [darajegalata@gmail.com](mailto:darajegalata@gmail.com)

## 10 **ABSTRACT**

11 **Background:** Hypertension is a major health issue, affecting the young population worldwide. A  
12 non-medical management approach can decrease the effects of high blood pressure levels in  
13 hypertensive patients. Even though NMM is one of the most effective ways to prevent & control  
14 hypertension, only little emphasis has been given to it compared with treating hypertension with  
15 medication. Therefore, this study aimed to assess the practice of non-medical management of  
16 hypertension and associated factors among hypertensive patients attending selected public  
17 hospitals in Hawassa City, Sidama, Ethiopia.

18 **Method:** Facility based cross-sectional study was conducted from April- May 2023. A simple  
19 random sampling technique was used to select study participants, and data was collected using an  
20 interviewer-administered questionnaire. Data was entered into Epi-Data version 4.2 and exported  
21 into SPSS version 26 for analysis. Binary logistic regression was used to identify the association  
22 between dependent variables and independent variables.

23 **Result:** The study revealed that 62.3 % of participants had good practice of non-medical  
24 management of hypertension (95%CI: 56.5-67.3). Additionally, 74.7 % had good knowledge,

25 (AOR=2.054; 95% CI: 1.180-3.575, P-value=0.011) and 65% exhibited favourable attitudes  
26 towards non-medical management of hypertension (AOR =2.368; 95% CI: 1.354-4.141, p-  
27 value=0.003). Factors such as good knowledge, rural residence (AOR=1.939 95% CI, 0.943,  
28 3.987, P-value=0.072) and having a family history of hypertension (AOR=1.764; 95% CI: 1.073-  
29 2.899, p-value=0.025) were statistically significant in association with non-medical management  
30 practice.

31 **Conclusion:** This study found that nearly two-thirds of participants demonstrated good practice of  
32 non-medical management of Hypertension. Good knowledge, favourable attitude towards non-  
33 medical management, rural residence and having a family history of hypertension were  
34 significantly associated with non-medical management of hypertension.

35 Therefore, public health interventions focusing on non-medical management of hypertension and  
36 strengthening NCD control programs are essential. Moreover, the provision of targeted Health  
37 education and behavioural change communication to patients can improve disease knowledge and  
38 improve Non-medical management practices.

39 **Keywords:** - Hypertension, non-medical management, Hypertension patient, Ethiopia

## 40 **Background**

41 Hypertension is defined as when increased blood pressure & the force of blood flowing through  
42 blood vessels are consistently too high. This occurs when systolic blood pressure is greater than  
43 or equal to 140 mmHg or diastolic blood pressure is greater than or equal to 90 mmHg. So that,  
44 hypertension is when blood pressure is reading 140/90 mmHg(1). High blood pressure, also known  
45 as hypertension, is a major contributor to the global disease burden and is responsible for 17.9  
46 million deaths each year globally. However, it remains widely undetected, undertreated and poorly  
47 controlled. Moreover, the number of people with uncontrolled hypertension has increased to  
48 around 1.13 billion worldwide in the past three decades(2) World Health Organization recommend  
49 evidence-based CVD prevention and management with a strategy called the Best Buys'' strategy  
50 (WHO, 2013-2020) (3) From this, the third objective of the strategy is reducing modifiable risk  
51 factors for hypertension. On the other hand, according to global Heart initiatives, there are five  
52 technical packages. Out of this, the first package is health system strengthening which includes a  
53 healthy lifestyle, evidence-based treatment protocol, access to essential medicines and technology,  
54 risk-based management team care, task sharing and a system for monitoring. (4) Generally,  
55 hypertension should be managed in an integrated fashion with a comprehensive set of non-  
56 pharmacological and pharmacologic strategies. The main part of the non-pharmacological strategy  
57 is non-medical management (1). It includes the Dietary Approaches to Stop Hypertension (DASH)  
58 diet (high in fruits, vegetables, low-fat dairy products, potassium and calcium; low in cholesterol  
59 and saturated fat), keep dietary sodium below 100 mmol (2.4 g) daily, keep daily alcohol intake  
60 below 1 oz. (30 mL; 2 drinks) in men or 0.5 oz. (15 mL) in women, aerobic exercise for at least  
61 30 minutes daily, achieve and maintain normal body weight, and recommend that smokers stop  
62 smoking. Compliance with all these strategies, a patient can lower blood pressure significantly and  
63 perhaps eliminate their hypertension.

64

## 65 **Methods and Materials**

### 66 **Study setting**

67 The study was conducted in Sidama regional state, Hawassa city, Sidama regional state, from  
68 April to May 2023. Hawassa is the capital city of Sidama Regional State. The city is located  
69 on the shores of Lake Hawassa in the Great Rift Valley at a distance of 275 km South of  
70 Addis Ababa. It covers 50.24 square kilometres, which has 8 sub-cities and 32 kebeles. Based  
71 on the information obtained from the plan and development core process of Hawassa City  
72 Administration, the city has an estimated total population of 351,469 out of which 190,757  
73 were males and 160,712 were females (CSA, 2016). In the city, there are E11 Health centers  
74 and 4 Public Hospitals (Hawassa City Administration Health Department, 2023).

### 75 **Study participants & eligibility criteria**

76 The study population were all Hypertensive patients who were attending their follow-ups at  
77 selected public hospitals during the study period. A randomly selected and those who fulfilled the  
78 inclusion criteria were included in the study. Adult hypertensive patients aged >18 years, attending  
79 follow-up at selected public hospitals for at least 6 months and more were included in the study.  
80 Patients who were seriously ill, having difficulties hearing and speaking (communication  
81 challenges), and patients who did not volunteer were excluded.

### 82 **Sample size determination**

83 The sample size was calculated using a single population proportion formula by assuming that  
84 68.92% of hypertensive patients have good practice for NMM of HTN (7) with a 95% confidence  
85 interval and 5% margin of error which is 270. Then by considering 10% of the non-response rate,  
86 the final sample size of 300 was used in the study.

### 87 **Sampling procedure and techniques**

88 All 4 public Hospitals namely, Adare General Hospital, Motite Furra Primary Hospital, Tula  
89 Primary Hospital and Hawassa University Comprehensive Specialized Hospital located in  
90 Hawassa City were included in the study. The calculated sample size was proportionally allocated  
91 to all Hospitals based on the number of hypertension patients on the following. Study subjects  
92 (adult hypertensive patients) with hypertension attending selected public hospitals for medical  
93 follow-up were recruited by using a simple random sampling method by considering patient flow  
94 as random.

### 95 **Data collection tools and procedures**

96 Data was collected through interviewer-administered & structured questionnaires which are  
97 adapted from previous similar studies. It contains information about socio-demographic  
98 characteristics and comprehensive practices about non-medical management of hypertension &  
99 associated factors.

100 Non-medical management practices were assessed using items that had Yes or No responses. The  
101 common NMM practices and activities like limiting salt consumption, engaging in regular  
102 exercise, maintaining a healthy diet, quitting smoking, and limiting alcohol consumption,  
103 consumption of caffeine, khat chewing, and regularly checking BP & weight were assessed with  
104 specific questions for participants to respond from the alternatives.

105 To assess the extent of non-medical management practices for hypertension among hypertensive  
106 patients, we administered a set of 15 practice-related questions. After collecting responses, we  
107 aggregated the scores of each respondent based on their answers to these questions. Those who  
108 scored at or above the mean value were categorized as having “Good practice”. While individuals  
109 who scored below the mean were classified as having,” poor practice” concerning NMM for  
110 hypertension.

111 To assess the level of knowledge regarding the practice of NMM for hypertension among study  
112 participants we used a set of 13 knowledge-based questions. The respondents’ answers to these

113 questions were then analyzed by calculating the mean score, and subsequently, their knowledge  
114 scores were aggregated. Based on the cumulated scores, participants who scored above or equal to  
115 the mean were classified as having a “Good knowledge level” concerning NMM of hypertension,  
116 while those who scored below the mean were classified as having a “poor knowledge level”.

117 To assess the level of attitude towards the practice of NMM (Non-Medical Management) for  
118 hypertension among study participants, a questionnaire containing 11 statements was utilized.  
119 Respondents were asked to indicate their level of agreement, ranging from "strongly agree" to  
120 "strongly disagree" on a five-point Likert-type scale. After collecting and analyzing the responses,  
121 participants who scored at or above the median value were categorized as having a "favourable  
122 attitude," while those who scored below the median were classified as having an "unfavourable  
123 attitude" towards NMM of hypertension.

124 The data collection tools were initially developed in English and later translated into Amharic. To  
125 ensure accuracy and desired results, we did a back translation of the instruments back into English.  
126 Before the main data collection process, a pre-test was conducted one week prior, involving 5%  
127 of the sample size, to assess the understandability and applicability of the instruments. After  
128 analyzing the pre-test data, any ambiguous or unclear questions were rephrased to enhance their  
129 understandability(10).

### 130 **Data processing and analysis**

131 Following the data collection, each questionnaire was checked for completeness, missed values  
132 and unlikely responses and cleaned up before leaving the study area. Data was entered into Epi-  
133 data and exported to SPSS for further analysis. Descriptive statistical analysis such as frequency  
134 distribution, means, and the measure of dispersion was used to describe data and analytical  
135 statistics including bivariate and multivariable logistic regression analysis. Binary logistic  
136 regression was done to examine the association between dependent and independent variables.  
137 After running binary logistic regressions, all variables with  $p < 0.25$  was considered a candidate

138 for the final model and the corresponding  $p$ -value of  $<0.05$  was considered statistically significant.  
139 Model fitness was checked by the Hosmer and Lemshow significance test that were 0.34 and  
140 multicollinearity between independent variables was checked by VIF. AOR at 95% CI was  
141 considered to declare the dependent effect of independent variables on the outcome.

## 142 **Ethical Consideration**

143 Ethical clearance was obtained from the Institutional Review Board, (*REF.No:IRB 222/15*) of  
144 Hawassa University College of Medicine and Health Sciences. A letter of support was obtained  
145 from Hawassa University College of Medicine and Health Sciences and the Hawassa City  
146 Administration Health Department. verbal informed Consent was obtained from each study  
147 participant after informing them of all the purposes, benefits, risks and the confidentiality of the  
148 information and the voluntary nature of the participation in the study.

## 149 **Result**

### 150 **Socio-demographic characteristics of the respondents**

151 A total of 300 participants were involved in the study. The mean age of participants was  $55.45 \pm$   
152  $11.27$  SD years and most of, 55% ( $n=165$ ) of participants were aged above 55 years. From the  
153 study participants, 63.6 % ( $n=191$ ) of respondents were male. Of the study participants, 83.3%  
154 ( $n=250$ ) were married, and 81% ( $n =243$ ) were from urban areas. More than one-third, 34.3  
155 ( $n=103$ ) of the respondents were government employees, (Table-1)

156 Table 1: Socio-demographic characteristics of the study participants in Hawassa CitY, Ethiopia  
157 ( $n=300$ )

| Variables | Frequency | Present (%) |
|-----------|-----------|-------------|
| Sex       |           |             |
| Male      | 191       | 63.6        |

|                           |     |      |
|---------------------------|-----|------|
| Female                    | 109 | 36.3 |
| <b>Marital status</b>     |     |      |
| Married                   | 250 | 83.3 |
| Single                    | 33  | 11.0 |
| Divorced                  | 8   | 2.7  |
| Widowed                   | 9   | 3.0  |
| <b>Age</b>                |     |      |
| <35 years                 | 27  | 9.0  |
| 35-44 years               | 76  | 25.3 |
| 45-54 years               | 32  | 10.7 |
| >=55 years                | 165 | 55.0 |
| <b>Permanent resident</b> |     |      |
| Urban                     | 243 | 81.0 |
| Rural                     | 57  | 19.0 |
| <b>Occupation</b>         |     |      |
| Government employee       | 103 | 34.3 |
| Private/NGO employee      | 24  | 8.0  |
| Merchant                  | 52  | 17.3 |
| Farmer                    | 27  | 9.0  |
| Student                   | 13  | 4.3  |
| Housewife                 | 47  | 15.7 |
| Daily labourer            | 6   | 2    |
| Retired                   | 28  | 9.3  |
| <b>Religion</b>           |     |      |



|                                          |     |      |
|------------------------------------------|-----|------|
| Orthodox                                 | 99  | 33.0 |
| Protestant                               | 140 | 46.7 |
| Muslim                                   | 47  | 15.7 |
| Catholic                                 | 13  | 4.3  |
| Others                                   | 1   | 0.3  |
| <b>Educational Status</b>                |     |      |
| Never attended school                    | 15  | 5.0  |
| Can read & write                         | 34  | 11.3 |
| Primary school (Grades 1-8)              | 38  | 12.7 |
| Secondary school (Grade 9-12)            | 64  | 21.3 |
| Diploma                                  | 83  | 27.7 |
| First Degree & above                     | 66  | 22.0 |
| <b>Income per month (Ethiopian birr)</b> |     |      |
| <500                                     | 74  | 24.7 |
| 500-1000                                 | 3   | 1.0  |
| 1001-1500                                | 4   | 1.3  |
| >1500                                    | 219 | 73.0 |
| <b>Time since diagnosis</b>              |     |      |
| <1year                                   | 29  | 9.7  |
| 2-5years                                 | 158 | 52.7 |
| 6-15years                                | 110 | 36.7 |
| >=15years                                | 3   | 1.0  |

158

159 **Practices of non-medical management of hypertension of the respondents**

160 Among the study participants, 62.3% demonstrated good practice in non-medical management of  
161 hypertension (95%CI: 56.5-67.3). Of the study participants, 31.3%(n=94)regularly checked their  
162 blood pressure, 49% (n=147) regularly checked their weight, 81.7 % ( n=245) didn't smoke  
163 cigarettes, 75.3 % ( n=226) abstained from drinking alcohol, 91.7% (n=275) did not chew khat,  
164 33.7(n=101) refrained from drinking coffee, 77.0 % ( n=231) included fruits and vegetables in their  
165 diet, 57% (n=171) Avoided consuming animal fat such a butter, and fatty meat),77%(n=231) did  
166 not use extra salt in the food. Moreover, a significant portion of the respondents, 58.3% (n=175)  
167 had experienced regular physical exercise. (Table-2)

168 Table 2: Practices of non-medical management of hypertension of the study participants in  
169 Hawassa City, Ethiopia, 2023 (300)

| Variables                           | Frequency | Present (%) |
|-------------------------------------|-----------|-------------|
| Check your blood pressure regularly |           |             |
| Yes (1)                             | 94        | 31.3        |
| No (0)                              | 206       | 68.7        |
| Check your weight regularly         |           |             |
| Yes(1)                              | 147       | 49.0        |
| No(0)                               | 153       | 51.0        |
| Smoke cigarette, currently          |           |             |
| Yes(0)                              | 55        | 18.3        |
| No(1)                               | 245       | 81.7        |
| Drink alcohol, currently            |           |             |
| Yes(0)                              | 74        | 24.7        |

|                                              |     |      |
|----------------------------------------------|-----|------|
| No(1)                                        | 226 | 75.3 |
| Chew Khat, currently                         |     |      |
| Yes                                          | 25  | 8.3  |
| No                                           | 275 | 91.7 |
| Drink coffee, currently                      |     |      |
| Yes                                          | 199 | 66.3 |
| No                                           | 101 | 33.7 |
| Eat fruits and vegetables                    |     |      |
| Yes(1)                                       | 231 | 77.0 |
| No(0)                                        | 69  | 23.0 |
| Eat animal fat (butter, fatty meat)          |     |      |
| Yes(0)                                       | 129 | 43.0 |
| No(1)                                        | 171 | 57.0 |
| Use extra salt                               |     |      |
| No                                           | 69  | 23.0 |
| Yes                                          | 231 | 77.0 |
| Have experience of regular physical exercise |     |      |
| Yes(1)                                       | 175 | 58.3 |
| No(0)                                        | 125 | 41.7 |
| Overall practice (Computed)                  |     |      |
| Good                                         | 187 | 62.3 |
| Poor                                         | 113 | 37.7 |

171 **Attitude towards practices of non-medical management of hypertension of the**  
 172 **respondents**

173 Of the study participants, 65% (195) had favorable attitudes with 95% CI (59.4-69.8). Specific to  
 174 the attitudes of the study participants, 217(72.3%) strongly agreed that follow-up education on the  
 175 non-medical management of hypertension is an essential component of HTN management,  
 176 140(46.7%) strongly agreed that regular checks of BP are an important part of HTN  
 177 management, 207(69.0%) were strongly agree on controlling salt intake was important for  
 178 controlling blood pressure, 140(46.7%) were strongly agree on maintaining normal body weight  
 179 was important for controlling blood pressure, 143(47.7%) were strongly agree on controlling diet  
 180 was important for controlling blood pressure, 128(42.7%) were agree on drinking caffeine affects  
 181 controlling blood pressure, 138(46%) were agreed on it's good to have whole fruits and vegetables  
 182 to lower blood pressure for HTN patients. On the other hand, 96(32%) strongly disagreed that  
 183 smoking cigarettes does not affect blood pressure, while 116(38.7) strongly agreed that Khat  
 184 chewing has an effect on the management of hypertension, and 154(51.3%) strongly agreed  
 185 that that regular physical exercise is important in the management of hypertension (Table-3)

186  
 187 Table 3: Attitude towards practices of non-medical management of hypertension of the study  
 188 participants in Hawassa City, Ethiopia, 2023 (n=300)

| <b>Attitude toward NMM of HTN</b>                                                                             | <b>Strongly Agree</b> | <b>Agree</b> | <b>Scale neutral</b> | <b>Disagree</b> | <b>Strongly disagree</b> |
|---------------------------------------------------------------------------------------------------------------|-----------------------|--------------|----------------------|-----------------|--------------------------|
| Follow-up education on the non-medical management of hypertension is an essential component of HTN management | 217(72.3%)            | 77(25.7%)    | 2(0.7%)              | 4(1.3%)         | 0(%)                     |

|                                                                                        |            |            |          |          |          |
|----------------------------------------------------------------------------------------|------------|------------|----------|----------|----------|
| Regular checking of BP is an important part of HTN management                          | 140(46.7%) | 140(46.7%) | 15(5.0%) | 5(1.7%)  |          |
| Controlling salt intake is important for controlling blood pressure                    | 207(69.0%) | 93(31.0%)  |          |          |          |
| Maintaining normal body weight is important for controlling blood pressure             | 140(46.7)  | 140(46.7)  | 15(5.0)  | 5(1.7)   |          |
| Controlling diet is important for controlling blood pressure                           | 143(47.7)  | 134(44.7)  | 19(6.3)  | 4(1.3)   |          |
| Excess alcohol intake can worsen the blood pressure level                              | 124(41.3)  | 117(39.0)  | 50(16.7) | 9(3.0)   |          |
| Drinking caffeine (like coffee, tea,.....) affects controlling blood pressure          | 117(39.0)  | 128(42.7)  | 43(14.3) | 12(4.0)  |          |
| It's good to have whole fruits and vegetables to lower blood pressure for HTN patients | 133(44.3)  | 138(46.0)  | 23(7.7)  | 5(1.7)   | 1(0.3)   |
| Smoking cigarettes does not affect blood pressure                                      | 27(9.0)    | 39(13.0)   | 91(30.3) | 47(15.7) | 96(32.0) |
| Khat chewing affects the management of hypertension                                    | 116(38.7)  | 73(24.3)   | 86(28.7) | 23(7.7)  | 2(.7)    |
| Regular physical exercise is important in the management of hypertension               | 154(51.3)  | 128(42.7)  | 13(4.3)  | 5(1.7)   |          |

189

190 **Knowledge level of respondents towards non-medical management of**  
 191 **hypertension**

192 In this study, the overall proportion of participants with a good Knowledge level towards non-  
193 medical management of hypertension was found to be 74.7 % ( n=224). Regarding specific  
194 knowledge about controlling hypertension, 83% (n=249) knew how to reduce the risk behaviours  
195 associated with HTN, and 87.7% (n=263) recognized the importance of maintaining a normal body  
196 weight to control blood pressure. Moreover, 91.7% (n=275) understood the significance of diet in  
197 controlling blood pressure, while 99.3% (n=298) acknowledged the importance of reducing salt  
198 intake for BP control. Participants were also knowledgeable about the beneficial effects of certain  
199 practices, as 83% (n=249) knew that consuming whole fruits and vegetables could help lower  
200 blood pressure. Furthermore, 79% (n=237) were aware of the adverse effects of excessive alcohol  
201 consumption on blood pressure, and 65.3% (n=196) understood the impact of smoking cigarettes  
202 on blood pressure. Additionally, 86.3% (n=259) were aware of the importance of regular physical  
203 exercise in controlling blood pressure, while 59% (n=177) recognized the effects of chewing khat  
204 on blood pressure. Lastly, 67.0% (n=201) were knowledgeable about the effects of caffeine on  
205 controlling blood pressure. (Table 5).

206 Table 4: Knowledge level of respondents toward non-medical management of hypertension of  
207 hypertension of the study participants in Hawassa City, Ethiopia, 2023 (n=300)

| Variables                                          | Frequency | Present (%) |
|----------------------------------------------------|-----------|-------------|
| Know the normal range of BP measurements           |           |             |
| Yes                                                | 261       | 87.0        |
| No                                                 | 39        | 13.0        |
| Hypertension can be preventable                    |           |             |
| Yes                                                | 260       | 86.7        |
| No                                                 | 40        | 13.3        |
| Ever heard about the non-medical management of HTN |           |             |

|                                                                     |     |      |
|---------------------------------------------------------------------|-----|------|
| Yes                                                                 | 183 | 61.0 |
| No                                                                  | 117 | 39.0 |
| Know how to reduce the risk behaviours of HTN                       |     |      |
| Yes                                                                 | 249 | 83.0 |
| No                                                                  | 51  | 17.0 |
| Know the importance of maintaining normal body weight to control BP |     |      |
| Yes                                                                 | 263 | 87.7 |
| No                                                                  | 37  | 12.3 |
| Know the importance of diet in controlling BP                       |     |      |
| Yes                                                                 | 275 | 91.7 |
| No                                                                  | 25  | 8.3  |
| Know the importance of reducing salt intake in controlling BP       |     |      |
| Yes                                                                 | 298 | 99.3 |
| No                                                                  | 2   | 0.7  |
| Know it's good to have whole fruits and vegetables to lower BP      |     |      |
| Yes                                                                 | 249 | 83.0 |
| No                                                                  | 51  | 17.0 |
| Know the effect of drinking excessive alcohol on controlling BP     |     |      |
| Yes                                                                 | 237 | 79.0 |
| No                                                                  | 63  | 21.0 |
| Know the effect of cigarette smoking on controlling BP              |     |      |

|                                                                    |     |      |
|--------------------------------------------------------------------|-----|------|
| Yes                                                                | 196 | 65.3 |
| No                                                                 | 104 | 34.7 |
| Know the importance of regular physical exercise in controlling BP |     |      |
| Yes                                                                | 259 | 86.3 |
| No                                                                 | 41  | 13.7 |
| Know the effect of chewing Khat on controlling BP                  |     |      |
| Yes                                                                | 177 | 59.0 |
| No                                                                 | 123 | 41.0 |
| Know the effect of caffeine on controlling blood pressure          |     |      |
| Yes                                                                | 201 | 67.0 |
| No                                                                 | 99  | 33.0 |
| Overall knowledge (Computed)                                       |     |      |
| Good                                                               | 224 | 74.7 |
| Poor                                                               | 76  | 25.3 |

208

## 209 **Health profile-related characteristics**

210 Of the study participants, 39.7 %(n=119) had a family history of HTN and 27.7 %( n=83) of the  
 211 respondents had co-morbidities. (Figure-1)

212

## 213 **Factors Associated with Practices of non-medical management of hypertension**

214 Logistic regression analysis was conducted to assess factors associated with practices of non-  
 215 medical management of hypertension. The Variables included in the analysis were rural residence,  
 216 good knowledge level, favourable attitude towards non-medical management of hypertension and



217 a family history of hypertension. As a result, the level of knowledge, and attitude towards non-  
 218 medical management of hypertension and having a family history of hypertension were found to  
 219 be significantly associated with practices of non-medical management of hypertension.  
 220 This study revealed that rural residents had higher odds of practising NMM practice of  
 221 hypertension compared to urban residents (AOR 1.939, 95% CI: 0.943- 3.987), P-value=0.072.  
 222 Respondents with good knowledge level toward practices of non-medical management of  
 223 hypertension among respondents were approximately two times more likely to practice these  
 224 strategies compared to those with low knowledge (AOR 2.368, 95% CI: 1.354- 4.141), p-  
 225 value=0.003) Similarly, respondents with a favourable attitude towards non-medical management  
 226 of hypertension had around two times higher odds of practising these methods compared to those  
 227 with an unfavourable attitude (AOR=2.054, 95% CI: 1.180-3.575, P-value=0.011). Furthermore,  
 228 respondents who had a family history of hypertension were approximately two times more likely  
 229 to practice non-medical management strategies compared to those without a family history of  
 230 hypertension (AOR=1.764, 95% CI: 1.073-2.899, P-value=0.025). These findings indicate that  
 231 both knowledge and attitude towards non-medical management of hypertension, as well as having  
 232 a family history of hypertension, are significant factors influencing the adoption of non-medical  
 233 management practices among the respondents. (Table-5)

234 Table 5: Bivariate and multivariate analysis of factors associated with practices of non-medical  
 235 management of hypertension, Hawassa City, Ethiopia

| Variables                 | Practices of NMMs of HTN |            | COR (95% CI)        | AOR (95% CI)         | P-Value      |
|---------------------------|--------------------------|------------|---------------------|----------------------|--------------|
|                           | Good                     | Poor       |                     |                      |              |
| <b>Permanent resident</b> |                          |            |                     |                      |              |
| Urban (ref)               | 142(58.4%)               | 101(41.6%) |                     |                      |              |
| Rural                     | 45(78.9%)                | 12(21.1%)  | 2.667(1.343, 5.296) | 1.939 (0.943, 3.987) | <b>0.072</b> |

|                                       |                 |            |                         |                      |              |
|---------------------------------------|-----------------|------------|-------------------------|----------------------|--------------|
| Level of knowledge                    |                 |            |                         |                      |              |
| Good                                  | 152(67.9%)<br>) | 72(32.1%)  | 2.473(1.454,<br>4.206)  | 2.368 (1.354, 4.141) | <b>0.003</b> |
| Low(ref)                              | 35(46.1%)       | 41(53.9%)  |                         |                      |              |
| <b>Level of Attitude</b>              |                 |            |                         |                      |              |
| Favourable                            | 81(77.1%)       | 24(22.9%)  | 0.353(0.207, 0.603)     | 2.054 (1.180, 3.575) | <b>0.011</b> |
| Unfavourabl<br>e (ref)                | 106(54.4%)<br>) | 89(45.6%)  |                         |                      |              |
| <b>Family History Of Hypertension</b> |                 |            |                         |                      |              |
| Yes                                   | 54(45.4%)       | 65(54.6%)  | 1.718 (1.067,<br>2.766) | 1.764 (1.073, 2.899) | <b>0.025</b> |
| No(ref)                               | 59(32.6%)       | 122(67.4%) |                         |                      |              |

236

## 237 Discussion

238 In this study, the prevalence of good practices towards non-medical management of hypertension  
 239 among the study participants was found to be 62.3%. This indicates that nearly two-thirds of  
 240 hypertensive patients had good practices towards non-medical management of hypertension. This  
 241 finding is higher than the study conducted in Addis Ababa, the level of good practice to  
 242 recommended LSM was found to be 23% (11), in West Aresi zone, Oromia 25.2% (9), in Mizan  
 243 Tepi 33.3% (12), a study in Durame, southern Ethiopia was 27.3% (13), in central Gondar zone,  
 244 the overall prevalence of recommended lifestyle modification was 24.2% (14), in Dessie, northeast  
 245 Ethiopia, adherence to lifestyle modifications was 23.6%(15), at Bishoftu General Hospital, of the  
 246 respondents had good practices was 38% (16) and in Hiwot Fana Specialized University Hospital  
 247 in Harar, Eastern Ethiopia was 136 (49.6%) had good practice on lifestyle modification (10).

248

249 On the other hand, this finding is similar to the study conducted in Bishoftu General Hospital,  
250 among the total respondents, 72.27% have good knowledge, 68.32% have a good attitude and  
251 61.39% have good practice (17), This finding lower than the study conducted in Nekemte, 68.92%  
252 of the respondent had a good practice (7). good knowledge about healthy lifestyle (AOR:0.42;  
253 95% CI: 0.24-0,74) (8), Of the total participants, only 25.2% (95% CI: 18.8-32.9) of the patients  
254 practised recommended lifestyle modifications, knowledge on hypertension management (AOR =  
255 14.6, 95% CI: 4.6 - 45.9) (9), 87% of respondents measured their blood pressure regularly  
256 compared to 38% of the subjects did not measure their blood pressure regularly and 58.3 % did  
257 physical exercise compared to 88% of the study participants did not carry out any form of physical  
258 activity (18) Patients who had favorable attitude were 2.054 times more likely practice of NMM  
259 than who had unfavourable attitude (AOR: 2.052,95% CI: 1.180, 3.575), patients who had a family  
260 history of HTN were 1.764 times more likely practice of NMM than who hadn't a family history  
261 of HTN (AOR: 1.764, 95% CI: 1.073, 2.899)

262 This study revealed that respondents with a good knowledge level towards non-medical  
263 management of hypertension were approximately two times more likely to practice these strategies  
264 compared to those with poor knowledge in this area. This finding indicates that hypertensive  
265 patients who possessed a better understanding of non-medical management elements were more  
266 likely to put these practices into action.

267

268 This result is comparable with the study conducted in Ghana, Nigeria (19) and in Dares Salaam,  
269 where people who had knowledge of HTN, only 63 (29.6%) had knowledge of the risk factors for  
270 HTN (20). On the other hand, respondents with a favourable attitude of the respondents toward  
271 non-medical management of hypertension were twofold, more likely to practice these strategies  
272 compared to those with an unfavourable attitude. This implies that having a favourable attitude

273 toward the non-medical management of hypertension improves practices of non-medical  
274 management of hypertension among patients. This finding was similar to studies conducted in  
275 Ghana (19), in Durame, southern Ethiopia, in the Central Gondar zone, in Dessie, northeast  
276 Ethiopia (15) and at Bishoftu General Hospital, Oromia Region(8). The differences in the results  
277 could be attributed to variations in sample size and sampling methods employed in the respective  
278 studies.

279

280 On the other hand, respondents with a family history of hypertension were approximately two  
281 times more likely to practice non-medical management of hypertension when compared to those  
282 without a family history of hypertension. This implies that having a family history of  
283 hypertension increases the likelihood practices of non-medical management of hypertension  
284 among hypertensive patients. However, this finding is not comparable to some previous studies,  
285 possibly due to differences in the study design, sample size, study time, nature of participants  
286 and environmental factors. This suggests that having a family history of hypertension increases  
287 the likelihood of adopting non-medical management practices among hypertensive patients.  
288 However, this finding is not directly comparable to some previous studies, possibly due to  
289 differences in study design, sample size, study setting, study time, nature of study participants,  
290 and environmental factors.

## 291 **Conclusions and recommendation**

292 This study aimed to assess the practice of non-medical management of hypertension and its  
293 associated factors among hypertensive patients. The findings revealed that one-third of the study  
294 participants exhibited poor practice in non-medical management of hypertension. Factors such as  
295 rural residence, good knowledge level, favourable attitude, and having a family history of

296 hypertension showed statistically significant associations with the practice of non-medical  
297 management of hypertension.

298 Based on these results, it is evident that there is a need for an integrated effort from various health  
299 disciplines to enhance patients' knowledge and attitudes towards non-medical management  
300 strategies for hypertension. By addressing these factors and providing comprehensive support,  
301 healthcare professionals can play a vital role in improving the overall management of hypertension  
302 in patients.

303

### 304 **Acknowledgement**

305 We would like to pass sincere thanks to the Hawassa City Administration Health Department and  
306 Hospitals for their cooperation in providing information that is important to this study.

307 Finally, we express our thanks to data collectors and study participants for their time, volunteers,  
308 and effort.

309

### 310 **References**

311 1. Carey RM, Whelton PK, Committee\* AAHW. Prevention, detection, evaluation, and  
312 management of high blood pressure in adults: synopsis of the 2017 American College of  
313 Cardiology/American Heart Association Hypertension Guideline. *Annals of internal medicine*.  
314 2018;168(5):351-8.

315 2. Organization WH. Transforming and scaling up health professionals' education and  
316 training: World Health Organization guidelines 2013: World Health Organization; 2013.

317 3. Bakhtiari A, Takian A, Majdzadeh R, Haghdoost AA. Assessment and prioritization of the  
318 WHO "best buys" and other recommended interventions for the prevention and control of non-  
319 communicable diseases in Iran. *BMC Public Health*. 2020;20(1):1-16.

- 320 4. Organization WH. Hearts: technical package for cardiovascular disease management in  
321 primary health care. 2016.
- 322 5. Pappachan JM, Chacko EC, Arunagirinathan G, Sriraman R. Management of hypertension  
323 and diabetes in obesity: non-pharmacological measures. *International Journal of Hypertension*.  
324 2011;2011.
- 325 6. Logan AG, Dunai A, McIsaac WJ, Irvine MJ, Tisler A. Attitudes of primary care  
326 physicians and their patients about home blood pressure monitoring in Ontario. *Journal of*  
327 *hypertension*. 2008;26(3):446-52.
- 328 7. Fetensa G, Milkiyas N, Besho M, Hasen T, Teshoma M, Wakuma B, et al. Assessment of  
329 knowledge and practice of lifestyle modification among hypertensive patients at Nekemte  
330 specialized hospital, western Oromia, Ethiopia: a cross-sectional study design. *J Cardiovasc Dis*  
331 *Diagn*. 2019;7(389):2.
- 332 8. Mideksa G, Solomon S, Geleta T. Level of adherence to lifestyle modifications and  
333 associated factors among hypertensive patients attending outpatient department at Bishoftu  
334 General Hospital, Oromia Region, Ethiopia, 2022. *Int J Cardiol Cardiovasc Dis*. 2022;2(1):17-27.
- 335 9. Wakjira H, Gobena T, Shore H. Lifestyle Modification Practice and Associated Factors  
336 among Diagnosed Hypertensive Patients in Selected Hospitals in West Arsi Zone, Oromia  
337 Regional, Ethiopia: HARAMYA UNIVERSITY; 2020.
- 338 10. Bogale S, Mishore KM, Tola A, Mekuria AN, Ayele Y. Knowledge, attitude and practice  
339 of lifestyle modification recommended for hypertension management and the associated factors  
340 among adult hypertensive patients in Harar, Eastern Ethiopia. *SAGE Open Medicine*.  
341 2020;8:2050312120953291.
- 342 11. Tibebu A, Mengistu D, Negesa L. Adherence to recommended lifestyle modifications and  
343 factors associated with hypertensive patients attending chronic follow-up units of selected public  
344 hospitals in Addis Ababa, Ethiopia. *Patient preference and adherence*. 2017;11:323.

- 345 12. Angelo AT, Geltore TE. Lifestyle modification practice and associated factors among  
346 diagnosed hypertensive patients in Mizan Tepi University Teaching Hospital Southwest Ethiopia,  
347 2019: a cross-sectional study. *PAMJ-Clinical Medicine*. 2020;2(156).
- 348 13. Buda ES, Hanfore LK, Fite RO, Buda AS. Lifestyle modification practice and associated  
349 factors among diagnosed hypertensive patients in selected hospitals, South Ethiopia. *Clinical*  
350 *hypertension*. 2017;23(1):1-9.
- 351 14. Smachew M, Melak MF, Atenafu A, Belew AK. Lifestyle Modification Practice and  
352 Associated Factors Among Diagnosed Hypertensive Patients in Selected Hospitals in Central  
353 Gondar Zone. *Nutrition and Metabolic Insights*. 2022;15:11786388221088245.
- 354 15. Andualem A, Gelaye H, Damtie Y. Adherence to lifestyle modifications and associated  
355 factors among adult hypertensive patients attending chronic follow-up units of Dessie Referral  
356 Hospital, North East Ethiopia, 2020. *Integrated Blood Pressure Control*. 2020:145-56.
- 357 16. Kebede T, Taddese Z, Girma A. Knowledge, attitude and practices of lifestyle modification  
358 and associated factors among hypertensive patients on-treatment follow up at Yekatit 12 General  
359 Hospital in the largest city of East Africa: A prospective cross-sectional study. *Plos one*.  
360 2022;17(1):e0262780.
- 361 17. Dabessa T. Knowledge attitudes and practice of non-pharmacologic therapy among  
362 hypertensive patients in Bishoftu, Ethiopia. *Ethiop J Health Sci*. 2015;19:32-8.
- 363 18. Sahoo D, Gosai H, Sahoo U, Harsoda J. Awareness and practices of non-pharmacological  
364 approaches for the management of hypertension in a geriatric population. *International Journal of*  
365 *Medical Students*. 2014;2(2):53-5.
- 366 19. Hadiza S, Yakasai AM, Yau JA, Adamu FI, Mijinyawa MS. Factor analysis of knowledge,  
367 attitude and practice of lifestyle modification measures among hypertensive patients in North-  
368 Western Nigeria. *J Med Res*. 2017;3(2):74-8.

369 20. Linda M. Knowledge, attitude and practices towards risk factors for hypertension in  
370 Kinondoni municipality, Dar es Salaam. Dar Es Salaam Medical Students' Journal. 2007;14(2):59-  
371 62.  
372



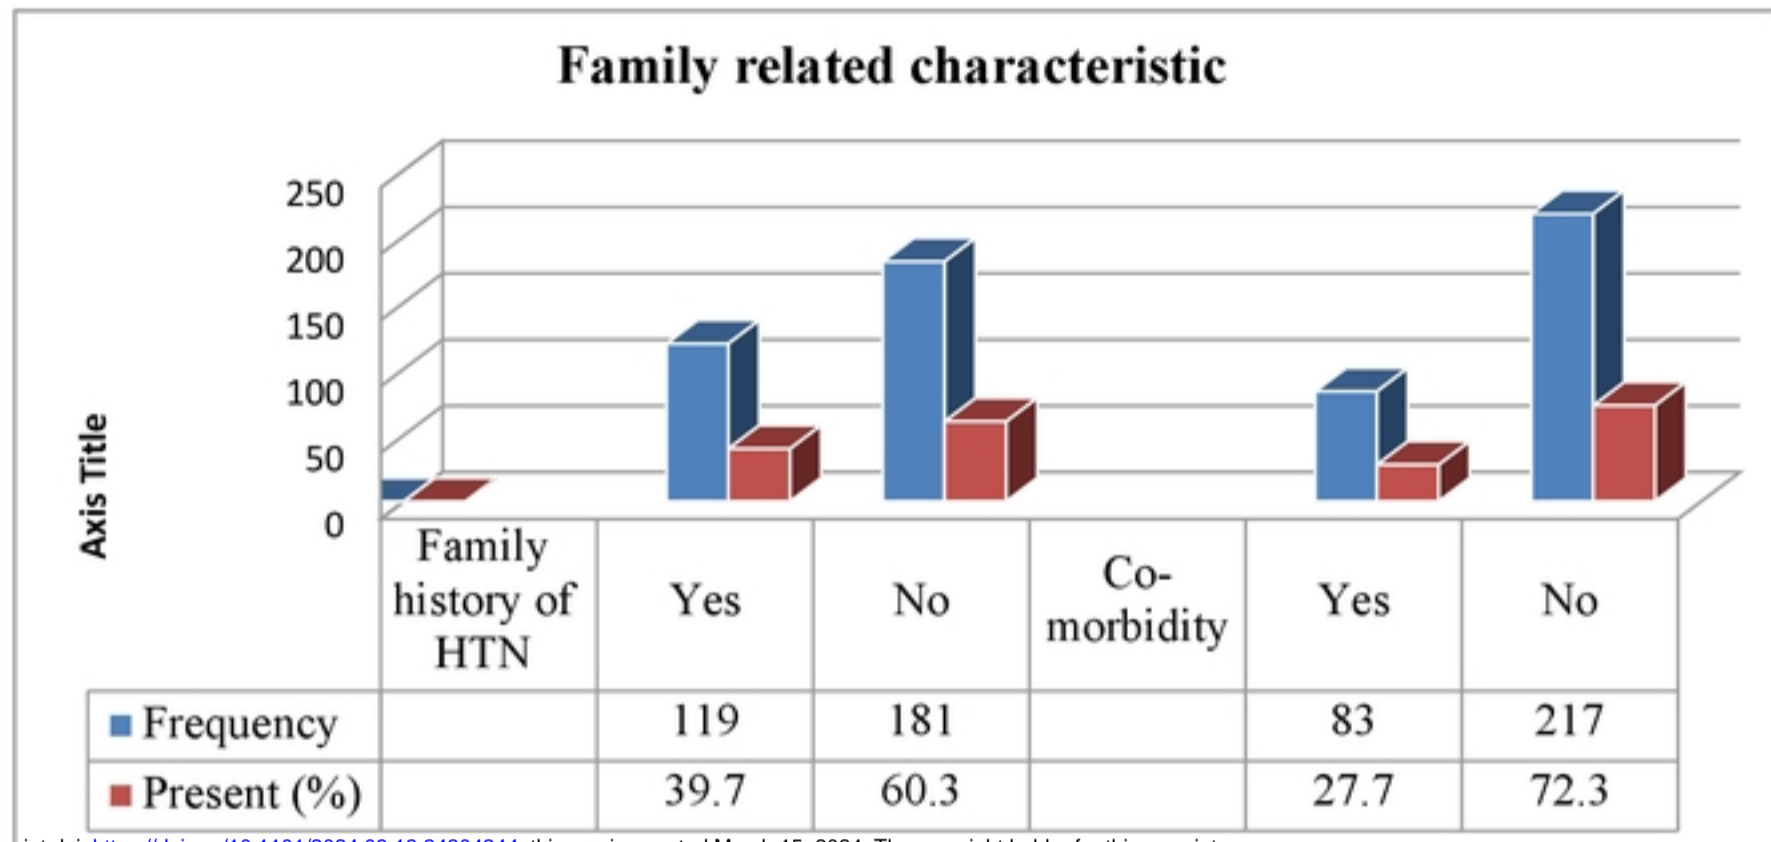

medRxiv preprint doi: <https://doi.org/10.1101/2024.03.13.24304244>; this version posted March 15, 2024. The copyright holder for this preprint (which was not certified by peer review) is the author/funder, who has granted medRxiv a license to display the preprint in perpetuity. It is made available under a [CC-BY 4.0 International license](https://creativecommons.org/licenses/by/4.0/).

Figure-1: Health profile related characteristic of hypertension of the study participants in Hawassa city, Ethiopia, 2023 (n=300)
